# Supplementary material for: Dynamic self-assembled polymer: HCl responsive inversion of supramolecular polymer handedness
Source: Royal Society of Chemistry journal article supplement (doi:10.1039/c7ra08035b), 2017-01-01
Supplement: c7ra08035b1.pdf [file c7ra08035b1.pdf]

## Supporting Information

# Dynamic self-assembled polymer: HCl responsive inversion of supramolecular polymer handedness †

ArpitaPaikar and Debasish Haldar\*

Department of Chemical Sciences, Indian Institute of Science Education and Research Kolkata,  
Mohanpur, West Bengal 741252, India,  
Fax: +913325873020; Tel: +913325873119;  
E-mail: [deba\\_h76@yahoo.com](mailto:deba_h76@yahoo.com); [deba\\_h76@iiserkol.ac.in](mailto:deba_h76@iiserkol.ac.in)

### Table of contents

|             |          |          |           |
|-------------|----------|----------|-----------|
| Scheme 1    | <b>2</b> | Fig. S11 | <b>7</b>  |
| ESI Fig. S1 | <b>2</b> | Fig. S12 | <b>7</b>  |
| ESI Fig. S2 | <b>2</b> | Fig. S13 | <b>8</b>  |
| ESI Fig. S3 | <b>3</b> | Fig. S14 | <b>8</b>  |
| ESI Fig. S4 | <b>3</b> | Fig. S15 | <b>9</b>  |
| ESI Fig. S5 | <b>4</b> | Fig. S16 | <b>9</b>  |
| ESI Fig. S6 | <b>4</b> | Fig. S17 | <b>10</b> |
| ESI Fig. S7 | <b>5</b> | Fig. S18 | <b>10</b> |
| ESI Fig. S8 | <b>5</b> | Fig. S19 | <b>11</b> |
| ESI Fig. S9 | <b>6</b> | Fig. S20 | <b>11</b> |
| Fig. S10    | <b>6</b> |          |           |

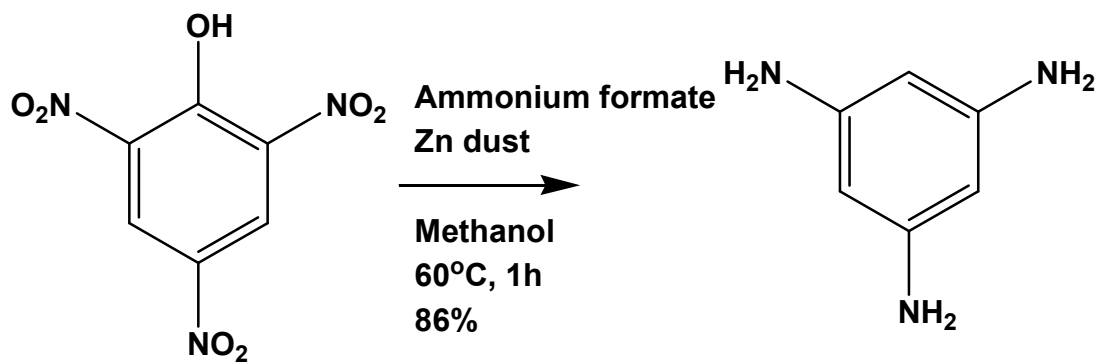

**ESI Scheme 1.** Schematic representation of synthesis of 1,3,5-triamino benzene from picric acid.

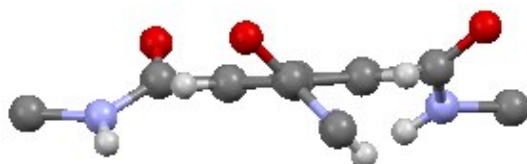

ESI Fig. S1 Trisamide with 3:0 conformation.

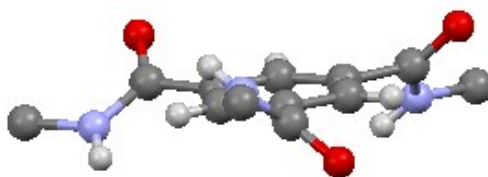

ESI Fig. S2 Trisamide with 2:1 conformation.

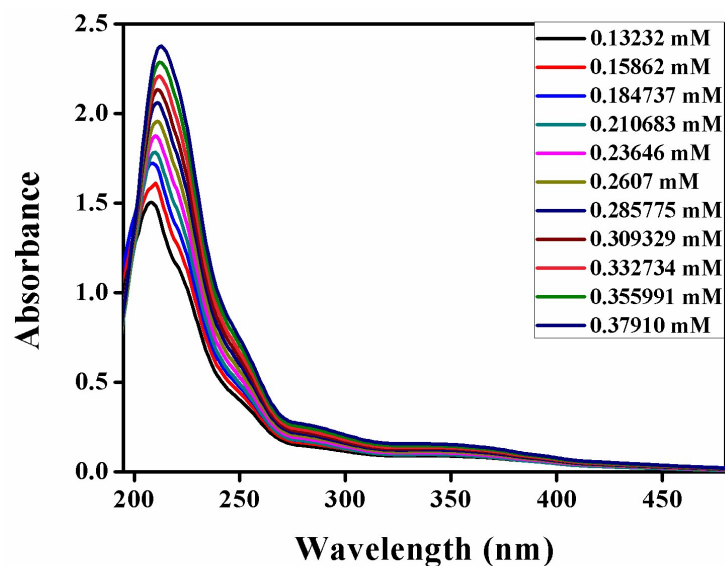

ESI Fig. S3: UV-vis spectra of trisamide 1 with increasing concentration.

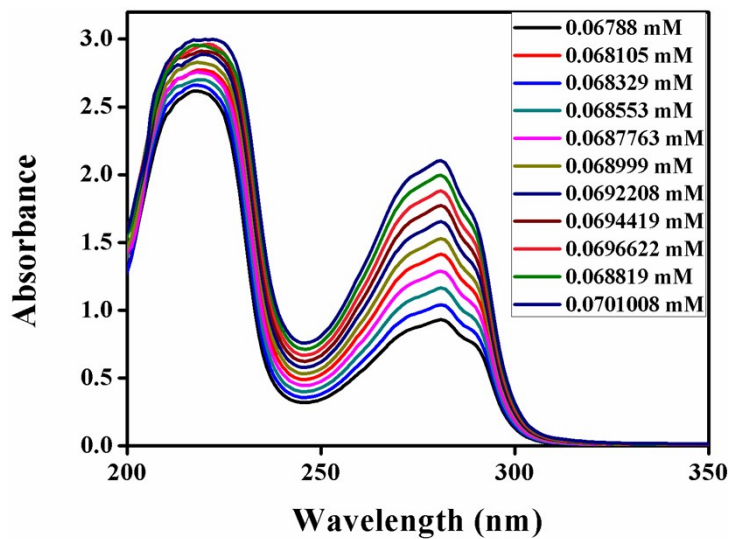

ESI Fig. S4: UV-vis spectra of trisamide 2 with increasing concentration.

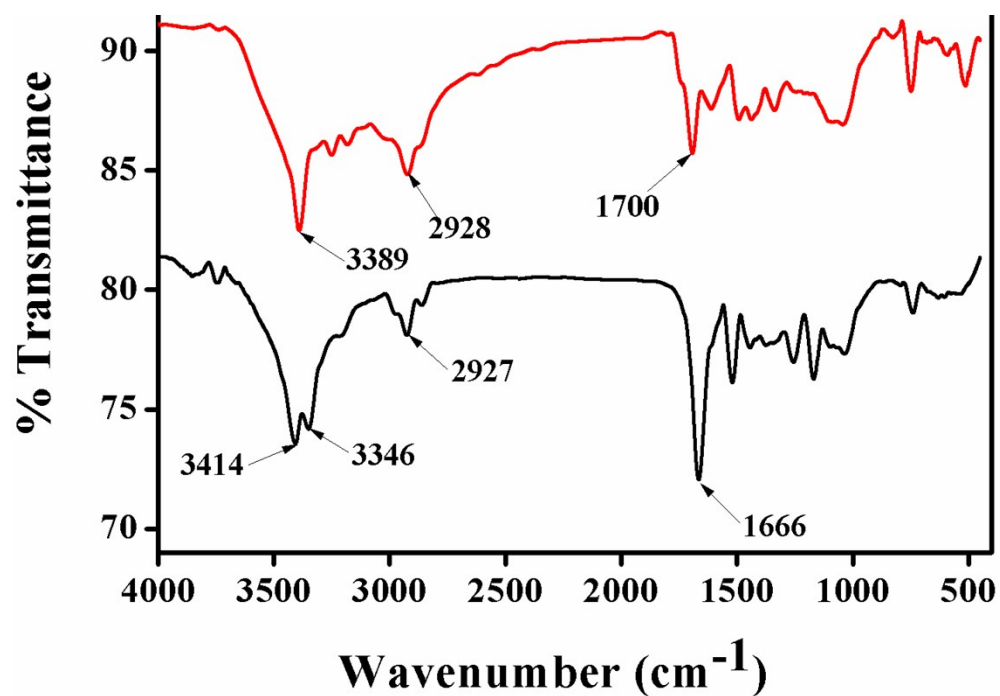

ESI Fig. S5: FT-IR spectra of trisamide **2** in absence of HCl (black) and in presence of HCl (red).

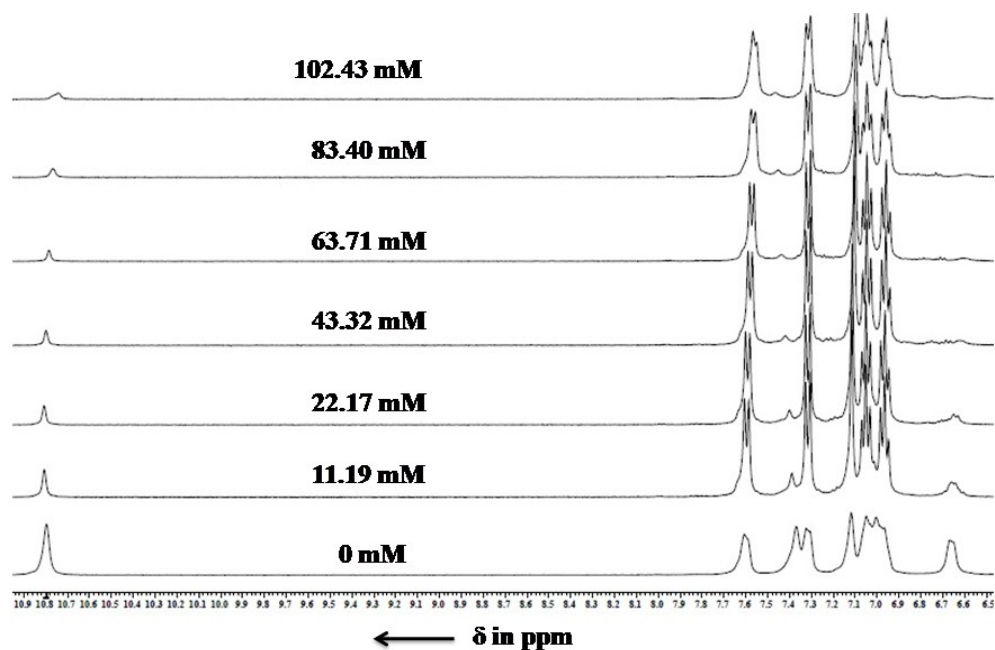

ESI Fig. S6: The acid dependence of NH chemical shifts of trisamide **2** at varying concentrations of HCl.

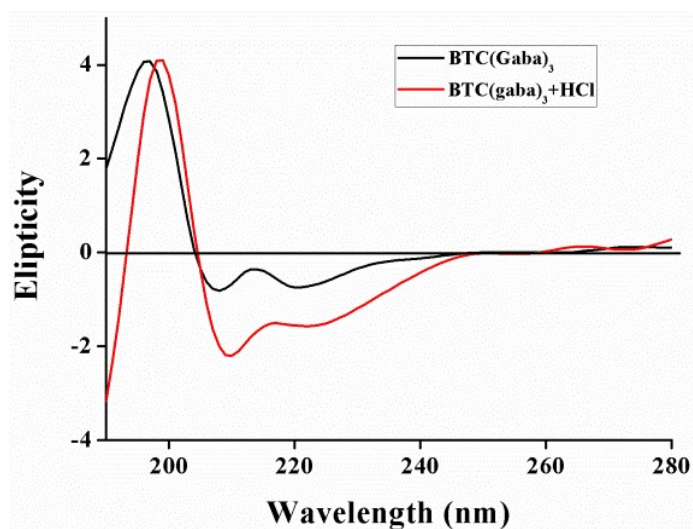

**ESI Fig. S7:** The CD spectra of trisamide containing  $\gamma$ -aminobutyric acid in methanol without HCl (black) and in presence of HCl (red).

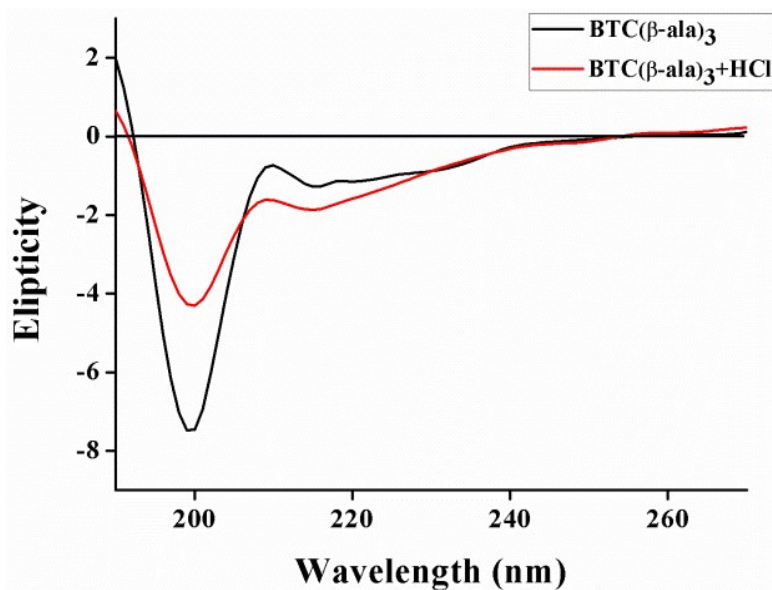

**ESI Fig. S8:** The CD spectra of trisamide containing  $\beta$ -alanine in methanol without HCl (black) and in presence of HCl (red).

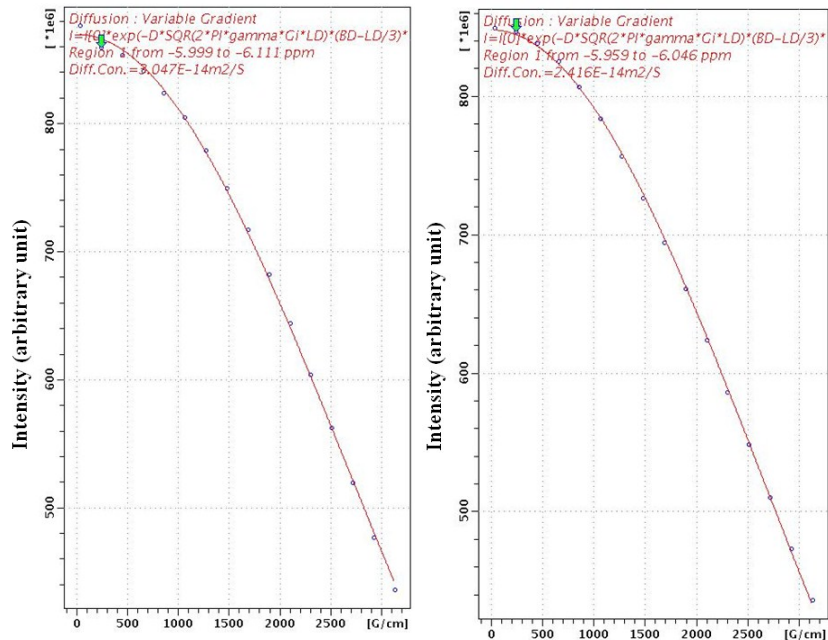

**ESI Fig. S9:** The plot of DOSY NMR of trisamide **1** with conc 0.075mol (left) and plot of DOSY NMR of trisamide **1** with conc 0.075mol after addition of 0.0075mol HCl (right).

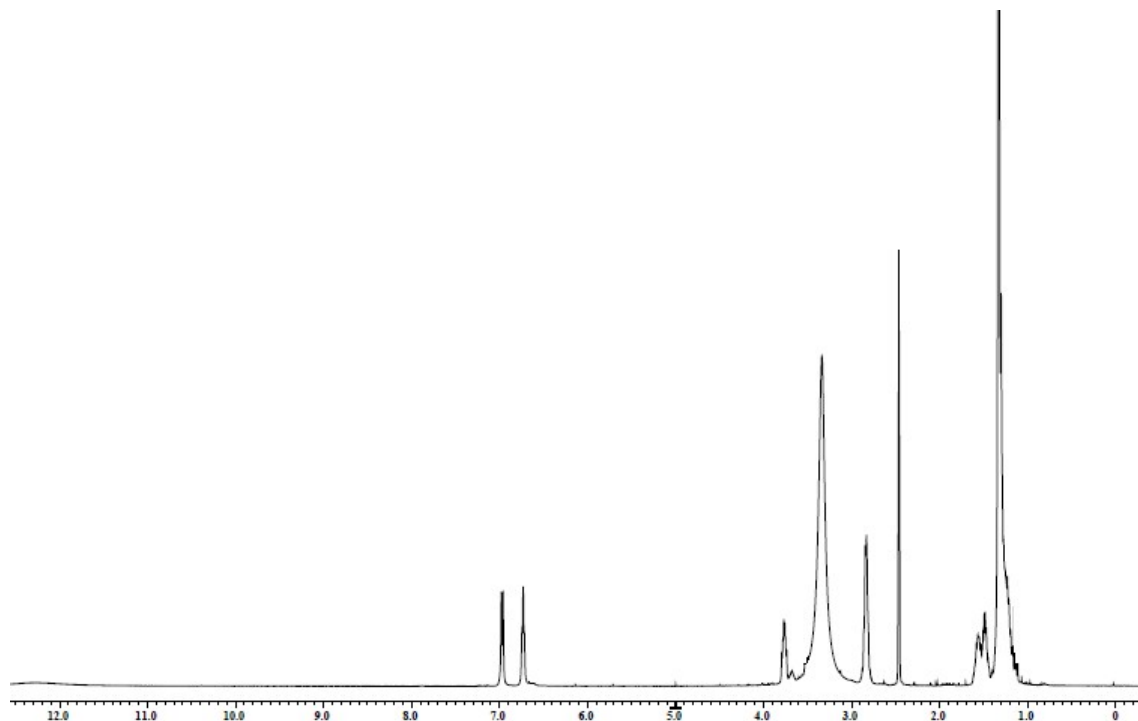

**Fig S10:**  $^1\text{H}$  NMR (DMSO- $d_6$ , 500 MHz,  $\delta$  in ppm) of Boc<sub>2</sub>-Lys-OH.

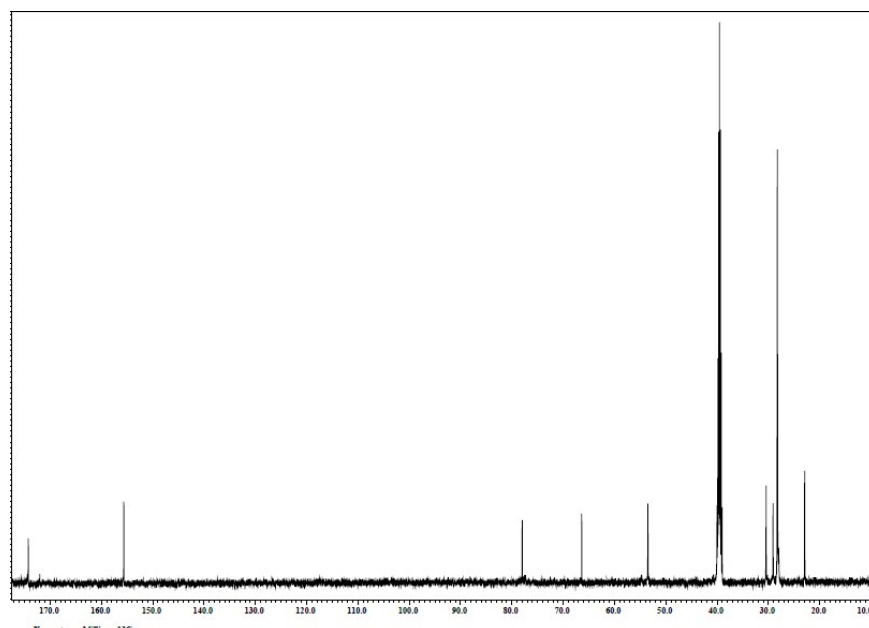

**Fig. S11:**  $^{13}\text{C}$  NMR (DMSO- $d_6$ , 125 MHz,  $\delta$  in ppm) of Boc $_2$ -Lys-OH.

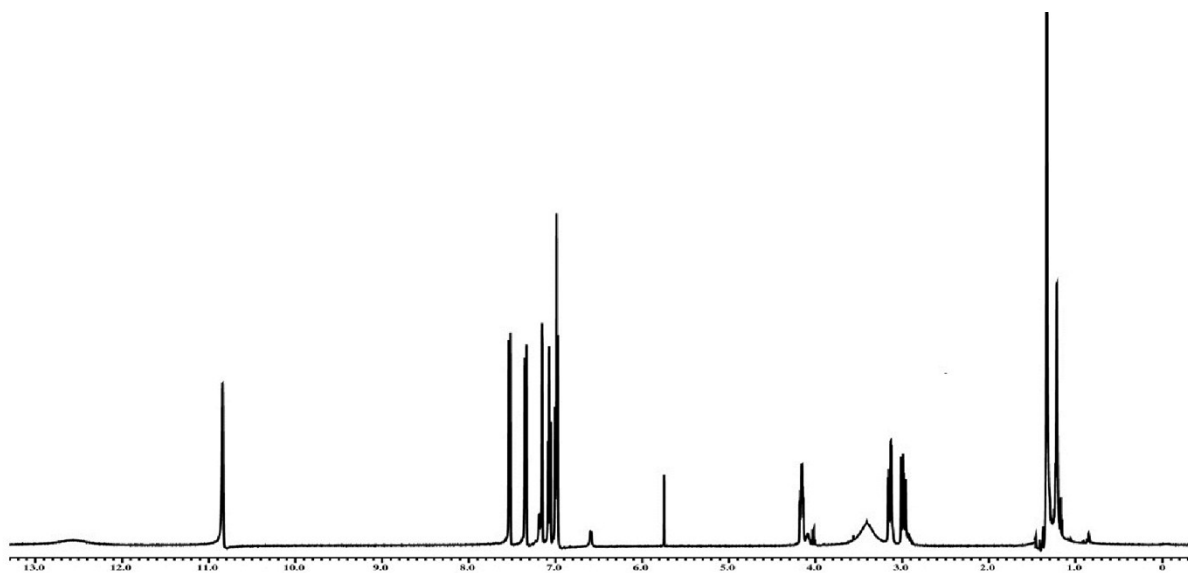

**Fig. S12:**  $^1\text{H}$  NMR (500MHz, DMSO- $d_6$ ,  $\delta$  in ppm) spectra of Boc-Trp-OH.

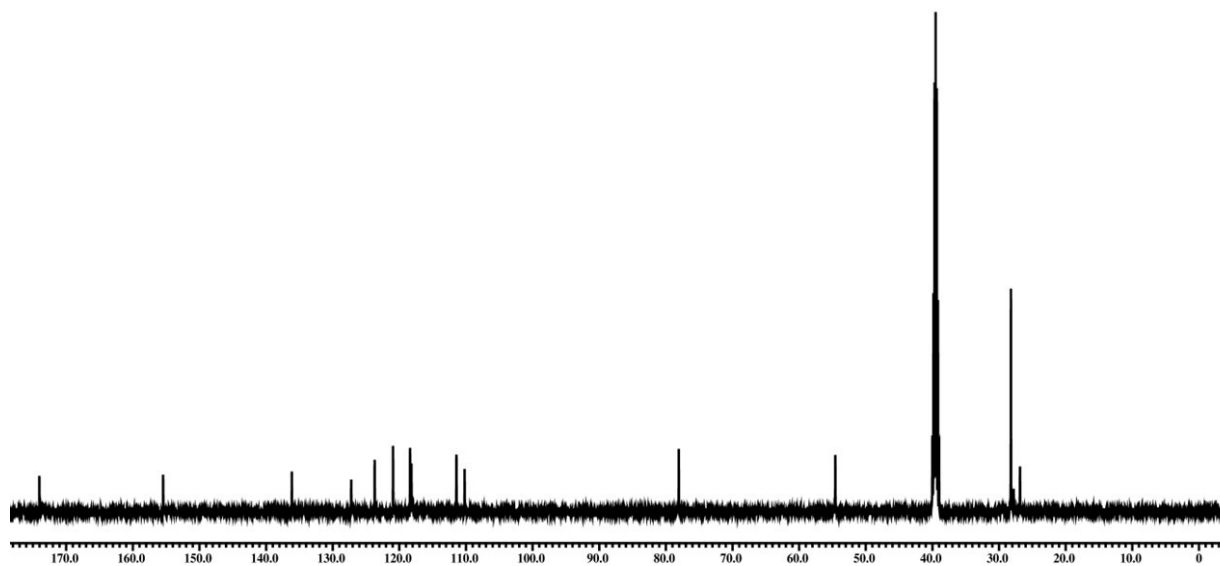

**Fig. S13:**  $^{13}\text{C}$  NMR (125 MHz,  $\text{DMSO-}d_6$ ,  $\delta$  in ppm) spectra of Boc-Trp-OH.

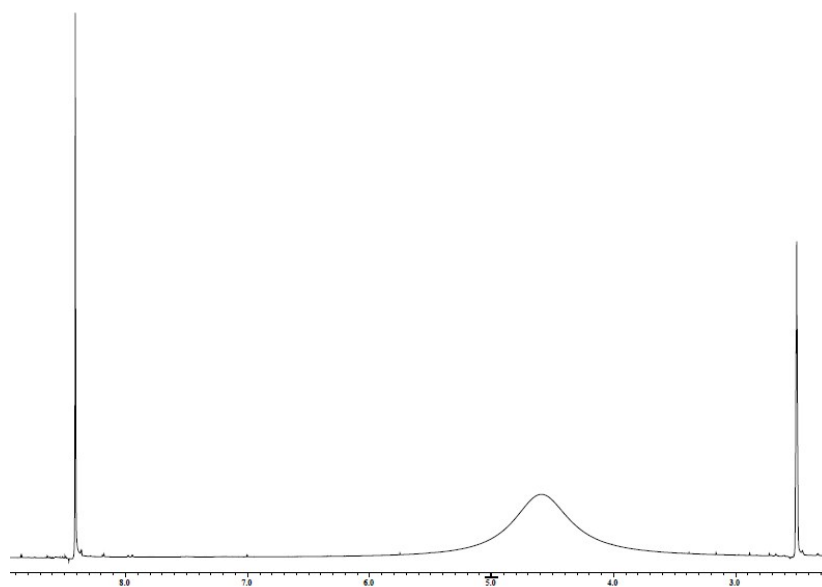

**Fig. S14**  $^1\text{H}$  NMR ( $\text{DMSO-}d_6$ , 400MHz,  $\delta$  in ppm) of 1,3,5-triaminobenzene.



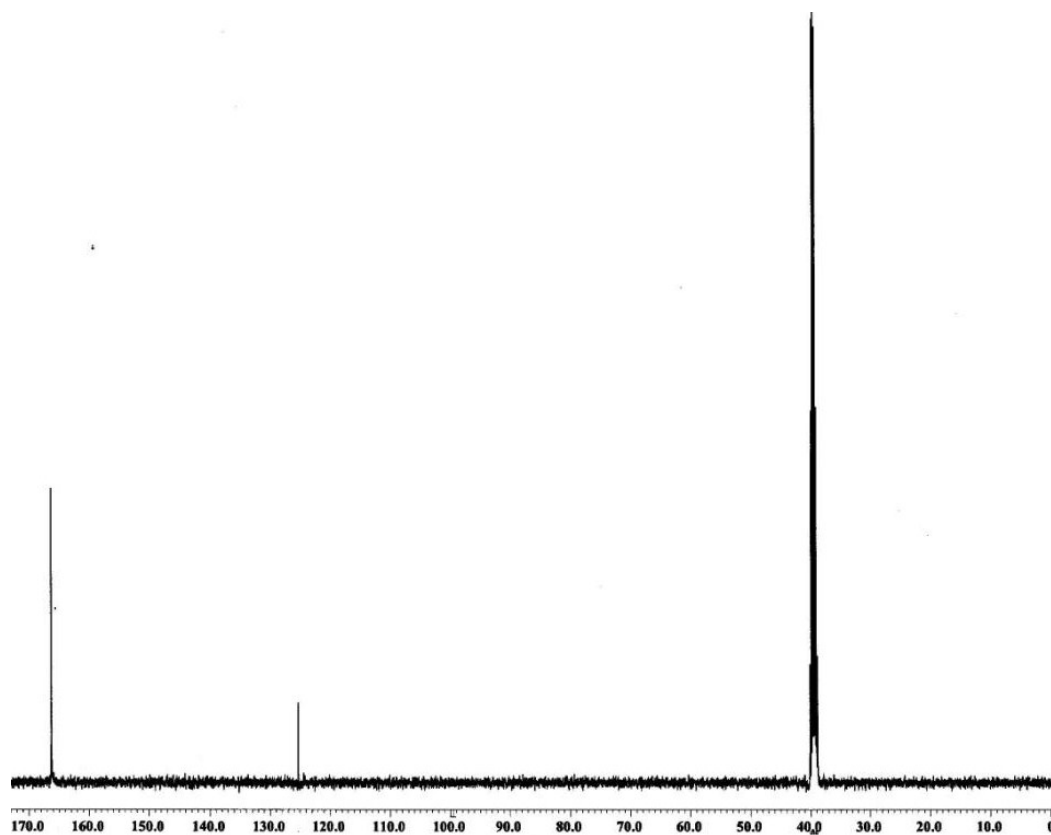

**Fig. S15**  $^{13}\text{C}$  NMR ( $\text{DMSO-}d_6$ , 100 MHz,  $\delta$  in ppm) of 1,3,5-triaminobenzene.

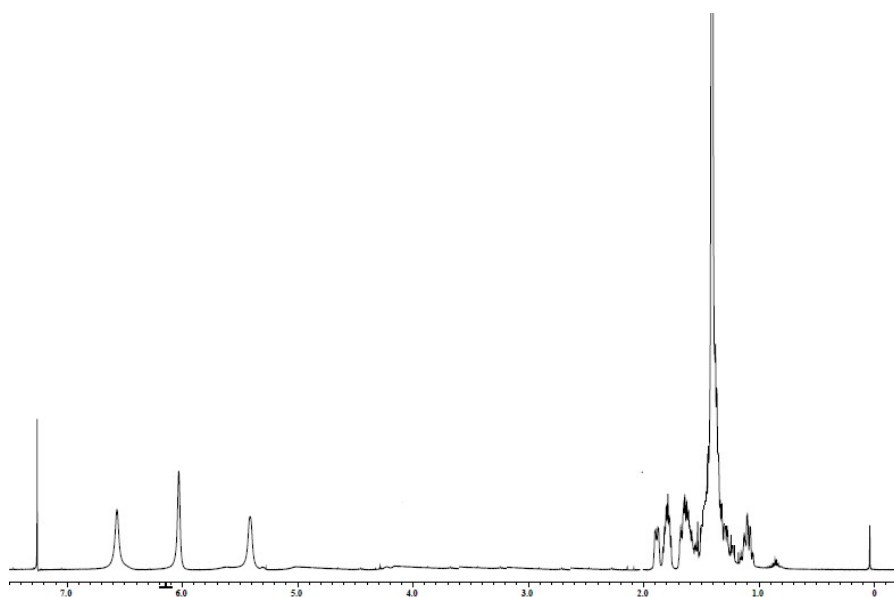

**Fig. S16**  $^1\text{H}$  NMR ( $\text{CDCl}_3$ , 500 MHz,  $\delta$  in ppm) of Trisamide **1**.

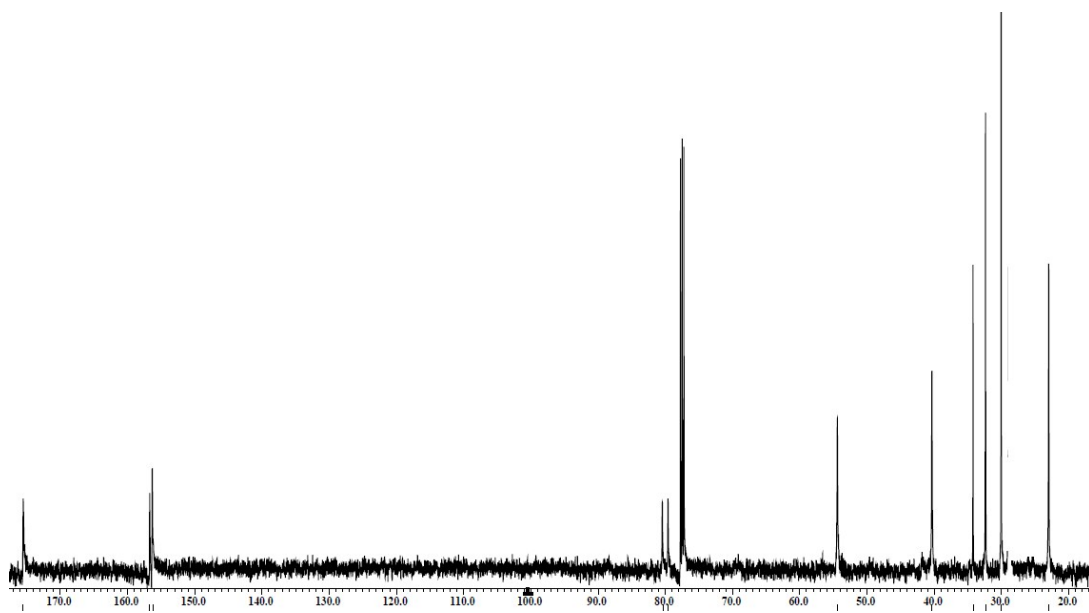

**Fig. S17**  $^{13}\text{C}$  NMR ( $\text{CDCl}_3$ , 125 MHz,  $\delta$  in ppm) of Trisamide **1**.

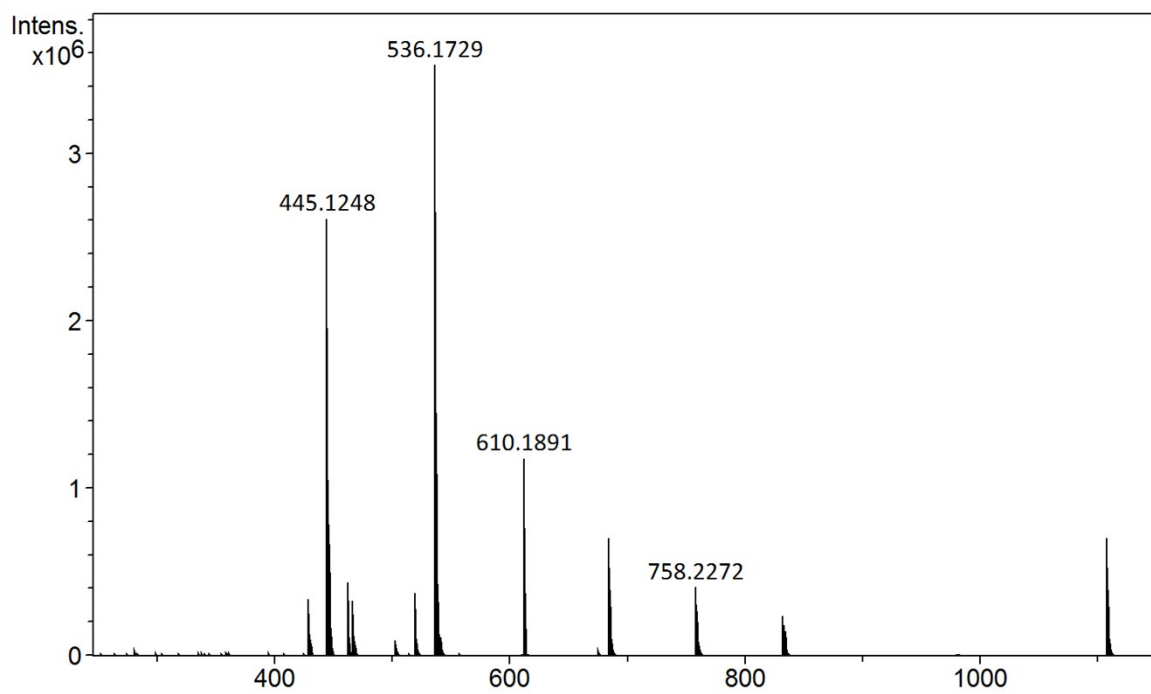

**Fig. S18** Mass spectra of Trisamide **1**.

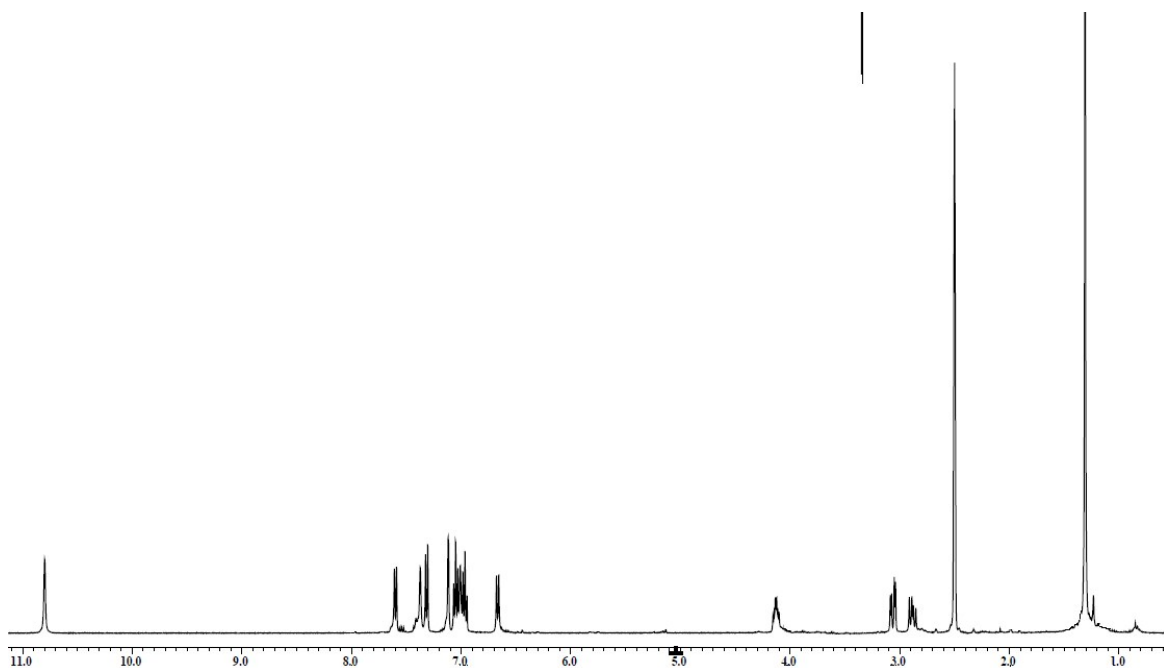

**Fig. S19**  $^1\text{H}$  NMR (DMSO- $d_6$ , 500 MHz,  $\delta$  in ppm) of Trisamide **2**.

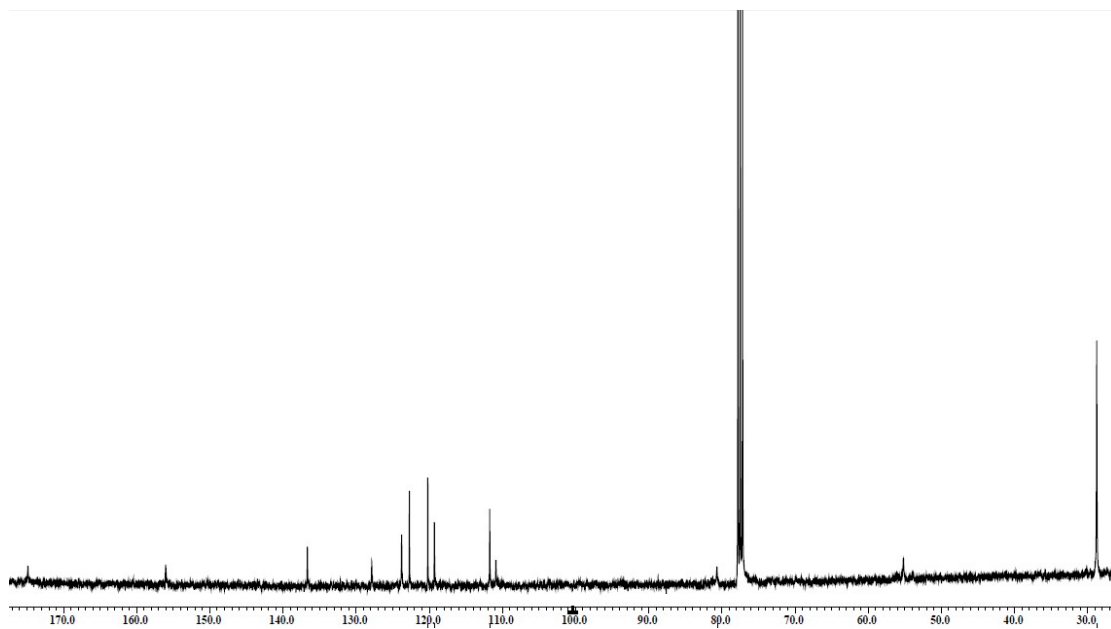

**Fig. S20**  $^{13}\text{C}$  NMR (DMSO- $d_6$ , 100 MHz,  $\delta$  in ppm) of Trisamide **2**.
